# Supplementary material
Source: Copernicus journal article supplement (doi:10.5194/acp-26-5635-2026)
Supplement: Supplementary file 1 [file acp-26-5635-2026-supplement.pdf]

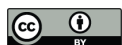

*Supplement of*

## **Measurement report: Ice nucleation ability of perthite feldspar powder**

**Julia Canet et al.**

*Correspondence to:* Albert Verdaguer (averdaguer@icmab.es)

The copyright of individual parts of the supplement might differ from the article licence.

1 **Mineral quarries and location fronts**

2 Six feldspar minerals sourced from two industrial quarries were investigated for their ice-nucleating (IN) activity. The  
3 samples were provided by two industrial mineral companies: Imerys (France) and LLANSÀ, S.A. (Llança, Catalonia,  
4 Spain).

5  
6 Two K-rich feldspar samples were supplied by the French industrial minerals company Imerys and collected from  
7 different extraction fronts within active operations. These samples are designated ImerysK1 (IK1) and ImerysK2  
8 (IK2). Although the company did not disclose the specific mine locations, both samples are known to originate from  
9 ongoing industrial extraction.

10  
11 Four additional feldspar samples were obtained from the LLANSÀ, S.A. quarry. These feldspar powders are labeled  
12 LlançaNa1 (LNa1), LlançaNa2 (LNa2), LlançaNaK1 (LNaK1), and LlançaNaK2 (LNaK2). Depending on the  
13 extraction front, the samples include two predominantly Na-rich feldspars and two feldspars with approximately  
14 balanced Na/K compositions. Specifically, sample LNa2 originates from the SN extraction front, samples LNa1 and  
15 LNaK2 from the SE extraction front, and sample LNaK1 from the N extraction front. Photographs of the  
16 corresponding extraction fronts are shown in Fig. S1.

17

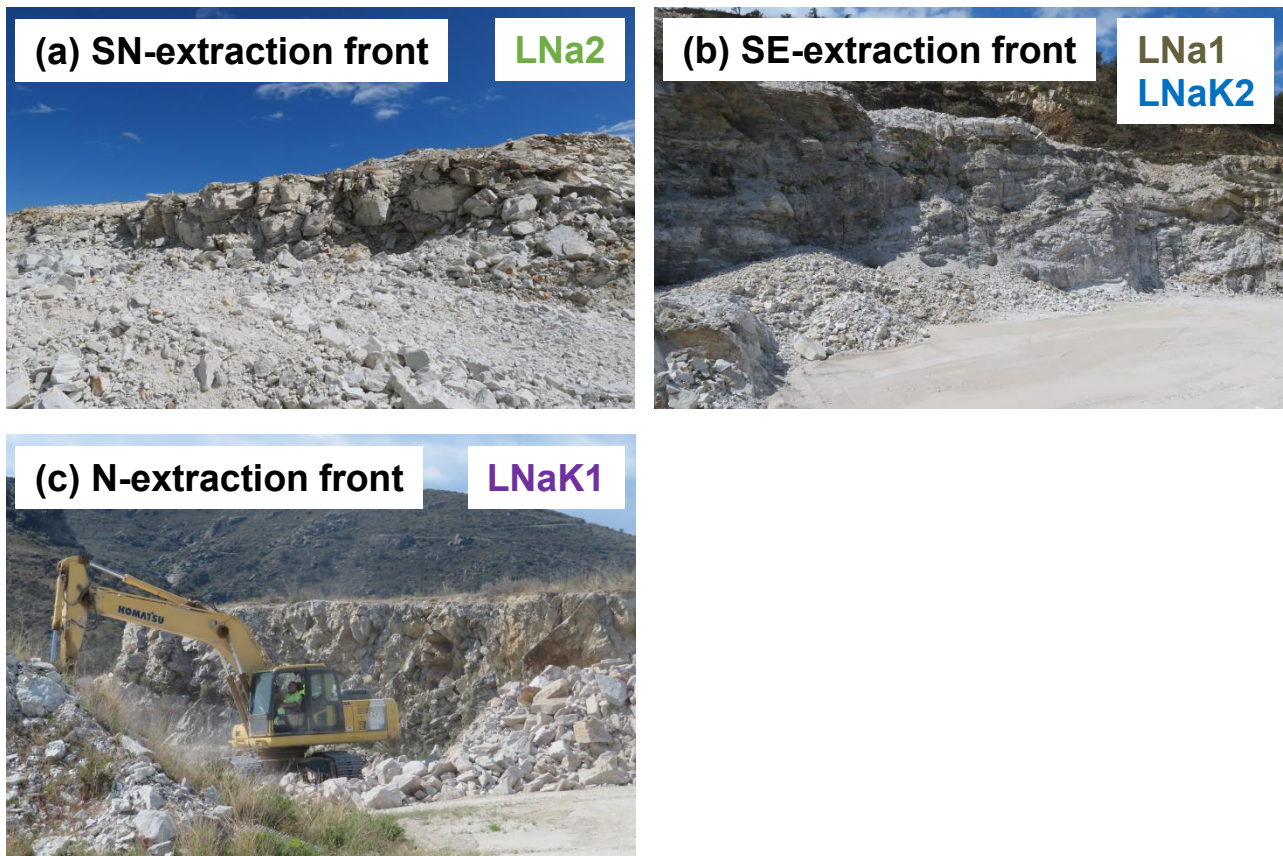

18

19 **Figure S1.** Pictures of the three extraction fronts of feldspars from LLANSÀ S.A. and the name of the sample obtained  
20 from each front. (a) SN-extraction front. (b) SE-extraction front. (c) N-extraction front.

21

## 22 **Milling procedure**

23 For the Llançà samples, representative portions of each bulk rock were crushed and homogenized using high-purity  
24 silica ball milling to produce fine powders. The production rate for all Llançà feldspar samples was 6 Tm h<sup>-1</sup>, whereas  
25 the LNa2 ‘small particles’ fraction was produced at 3 Tm h<sup>-1</sup>, where Tm denotes metric tonnes. These powders were  
26 primarily prepared for ice nucleation experiments, and additionally used for granulometric, chemical, and  
27 mineralogical analyses.

## 30 **Chemical and mineral composition**

31 The chemical composition of the feldspar samples was determined using a Philips PW 2400 X-ray fluorescence (XRF)  
32 sequential spectrometer located at the Centres Científics i Tecnològics de la Universitat de Barcelona (CCiT-UB).  
33 Major oxides (expressed as weight percent) were quantified via the fused bead method, while trace elements (in ppm)  
34 were measured using pressed powder pellets (see Table S1 and S2). Quantification was calibrated against certified  
35 geological standards to ensure analytical accuracy. In addition, thermal treatments were conducted to assess Loss on  
36 Ignition [ASTM D7348-21].

37  
38 Mineralogical characterization was conducted through a combination of X-ray diffraction (XRD), Optical Microscope  
39 (OM), and Scanning Electron Microscope (SEM). XRD measurements were performed on a PANalytical X’Pert  
40 System diffractometer, configured in Bragg-Brentano geometry with Cu K $\alpha$  radiation ( $\lambda = 1.54061 \text{ \AA}$ ). Phase  
41 identification and semi-quantitative analysis were conducted with the XPert Graphics Identify software (Philips). For  
42 microstructural and petrographic examination, double-polished thin sections were observed using a Nikon ACT-1  
43 optical microscope. The same sections were examined using a Hitachi TM-1000 tabletop SEM, coupled with energy-  
44 dispersive X-ray spectroscopy (EDS) to analyze microstructural features and verify elemental composition.

45

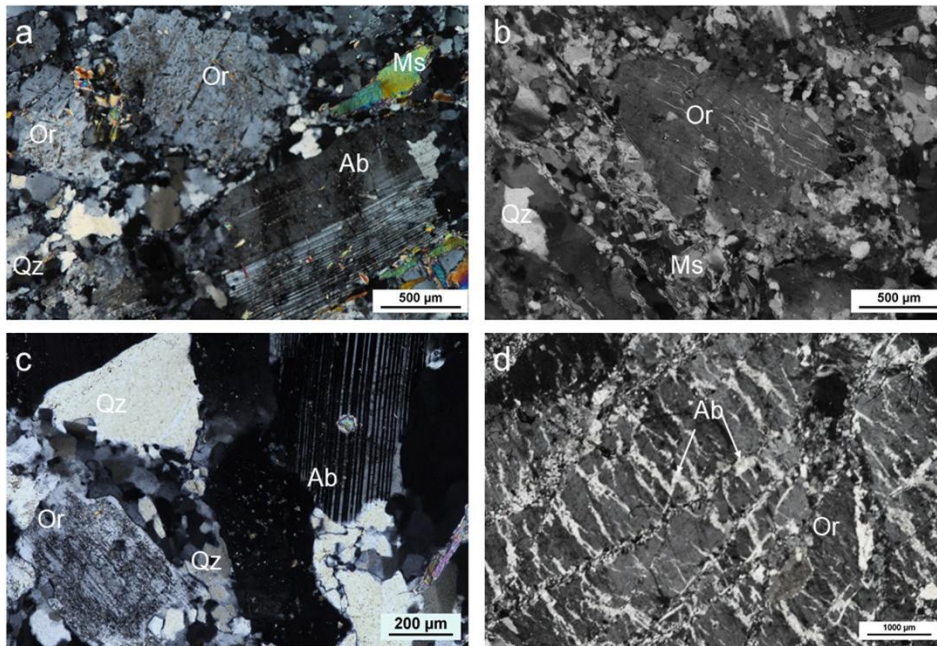

46

47 **Figure S2.** Photomicrographs (under crossed polars) corresponding to three exploration levels of the pegmatitic  
 48 feldspars from Llançà. (a) Granular texture formed by a large euhedral albite crystal showing polysynthetic twinning  
 49 and a hemihedral orthoclase crystal, surrounded by small anhedral quartz and muscovite crystals. (b) The central part  
 50 shows a hemihedral orthoclase crystal with micropertthite texture surrounded by quartz. (c) Euhedral albite  
 51 (polysynthetic twinning) and orthoclase being altered to kaolinite and sericite accompanied with several sizes of quartz  
 52 grains. (d) Perthitic texture shows fine lamellar albite crystals forming a braided pattern in an orthoclase host.  
 53 Abbreviations: Ab, albite; Ms, muscovite; Or, orthoclase; Qz, quartz.

54 **Table S1.** Bulk chemical composition of the studied feldspars, expressed as wt% oxides determined by X-ray fluorescence (XRF). Oxide ratios (K<sub>2</sub>O/Na<sub>2</sub>O and  
 55 SiO<sub>2</sub>/Al<sub>2</sub>O<sub>3</sub>) and Loss on ignition (LOI) are also reported.

| Sample name | Texture        | Main polymorph | SiO <sub>2</sub> | Al <sub>2</sub> O <sub>3</sub> | Na <sub>2</sub> O | K <sub>2</sub> O | CaO  | K <sub>2</sub> O/<br>Na <sub>2</sub> O | SiO <sub>2</sub> /<br>Al <sub>2</sub> O <sub>3</sub> | MgO  | Fe <sub>2</sub> O <sub>3</sub> | TiO <sub>2</sub> | P <sub>2</sub> O <sub>5</sub> | LOI  |
|-------------|----------------|----------------|------------------|--------------------------------|-------------------|------------------|------|----------------------------------------|------------------------------------------------------|------|--------------------------------|------------------|-------------------------------|------|
| IK1         | Perthitic      | Mc             | 64.97            | 18.81                          | 2.95              | 12.78            | 0.32 | 4.3                                    | 3.4                                                  | 0.03 | 0.06                           | 0                | 0.07                          | –    |
| IK2         | Perthitic      | Mc             | 65.84            | 18.76                          | 3.31              | 11.86            | 0.1  | 3.6                                    | 3.5                                                  | 0.01 | 0.1                            | 0                | 0.01                          | 0.19 |
| LNaK1       | Perthitic      | Or/Mc          | 75.18            | 14.85                          | 3.67              | 3.78             | 0.79 | 1.0                                    | 5.1                                                  | 0.17 | 0.62                           | 0.08             | 0.29                          | 0.83 |
| LNaK2       | Perthitic      | Or/Mc          | 73.23            | 15.30                          | 5.13              | 4.83             | 0.65 | 0.9                                    | 4.8                                                  | 0.06 | 0.11                           | 0.01             | 0.31                          | 0.38 |
| LNa1        | Anti-perthitic | Ab             | 75.67            | 14.17                          | 5.91              | 2.27             | 0.73 | 0.4                                    | 5.3                                                  | 0.07 | 0.14                           | 0.02             | 0.30                          | 0.35 |
| LNa2        | Anti-perthitic | Ab             | 75.71            | 14.46                          | 6.84              | 1.38             | 0.75 | 0.2                                    | 5.2                                                  | 0.07 | 0.15                           | 0.02             | 0.30                          | 0.44 |

56 **Table S2.** Trace elements concentration (in ppm) measured using X-ray fluorescence (XRF) for the feldspar powders.  
 57 Values reported as <ld indicate concentrations below the detection limit. Rb and Sr values are highlighted in red due  
 58 to their direct mention in the main text.

| ppm | IK1   | IK2   | LNaK1 | LNaK2 | LNa1  | LNa2  |
|-----|-------|-------|-------|-------|-------|-------|
| As  | 3.7   | <ld   | <ld   | 1.96  | <ld   | <ld   |
| Ba  | 60.1  | 59.5  | 141.7 | 314.1 | 147.8 | 116.3 |
| Ce  | <ld   | <ld   | 6.7   | <ld   | <ld   | <ld   |
| Co  | <ld   | <ld   | <ld   | 69.6  | <ld   | <ld   |
| Cr  | <ld   | <ld   | <ld   | <ld   | <ld   | <ld   |
| Cu  | 5     | 1.5   | 1.2   | <ld   | 0.3   | 0.2   |
| Ga  | 11.1  | 28.9  | 24.5  | 16.2  | 20.7  | 20.0  |
| La  | <ld   | 1.8   | <ld   | <ld   | <ld   | <ld   |
| Mo  | 0.2   | <ld   | <ld   | <ld   | <ld   | <ld   |
| Nb  | 8.9   | 9.1   | 16.7  | 19.3  | 13.9  | 13.1  |
| Nd  | <ld   | <ld   | <ld   | <ld   | <ld   | <ld   |
| Ni  | 1.7   | <ld   | <ld   | <ld   | <ld   | <ld   |
| Pb  | 187.5 | 9.2   | 34.3  | 8.2   | 14.0  | 14.6  |
| Rb  | 839.2 | 607.2 | 181.9 | 159.3 | 102.4 | 64.5  |
| Sc  | <ld   | <ld   | 2.4   | <ld   | <ld   | <ld   |
| Sn  | 5.2   | <ld   | 13.1  | 5.0   | 5.7   | 4.6   |
| Sr  | 25.2  | 26.6  | 54.9  | 132.9 | 92.6  | 78.8  |
| Th  | 2.6   | 3.3   | 4.1   | 2.7   | 3.2   | 2.9   |
| V   | 4.8   | 4.3   | 8.8   | 5.7   | 6.6   | 6.1   |
| W   | <ld   | 11.4  | 1.4   | 575.1 | <ld   | <ld   |
| Y   | 24    | 17.8  | 14.2  | 7.4   | 8.2   | 7.2   |
| Zn  | 61.5  | 51.3  | 8.1   | 53.8  | 36.3  | 41.0  |
| Zr  | 37.1  | 33.1  | 261.9 | 36.4  | 42.2  | 42.1  |
| Ag  | <ld   | <ld   | <ld   | <ld   | <ld   | <ld   |
| Bi  | 5.1   | 5.2   | 6.0   | 4.6   | 5.1   | 5.2   |
| Br  | 2.2   | 1.8   | 2.4   | 6.1   | 2.3   | 2.0   |
| Cd  | <ld   | <ld   | 0.7   | <ld   | <ld   | <ld   |
| Cs  | 42.3  | 0.1   | 10.0  | <ld   | 5.6   | 3.3   |
| Ge  | 7     | 6.7   | 1.8   | 5.4   | 2.3   | 2.7   |
| Hf  | 10.7  | 9.6   | 5.6   | 10.9  | 8.5   | 6.6   |
| Hg  | 61.5  | 63.3  | 25.4  | <ld   | 25.0  | 35.3  |
| I   | <ld   | <ld   | 1.7   | <ld   | 2.6   | 2.5   |
| Mn  | 41.2  | 32.7  | 250.3 | 41.0  | 115.1 | 116.8 |
| Sb  | 1.9   | 1.3   | 1.0   | 2.4   | 2.2   | 2.2   |
| Se  | 0.2   | 0.1   | 0.1   | <ld   | 0.3   | <ld   |
| Sm  | <ld   | 2.5   | 0.4   | <ld   | 1.4   | 0.9   |

|    |     |     |      |     |     |     |
|----|-----|-----|------|-----|-----|-----|
| Ta | 2.5 | 1.9 | 3.8  | 9.5 | 3.5 | 3.2 |
| Te | 0.2 | <1d | -0.3 | 0.5 | 2.0 | <1d |
| Tl | 3.7 | 2.1 | 2.5  | 1.2 | 1.1 | 1.2 |
| U  | 4.3 | 4.2 | 6.8  | 2.7 | 7.7 | 6.0 |
| Yb | 7   | 3.2 | 5.0  | 5.6 | 5.6 | 4.2 |

59

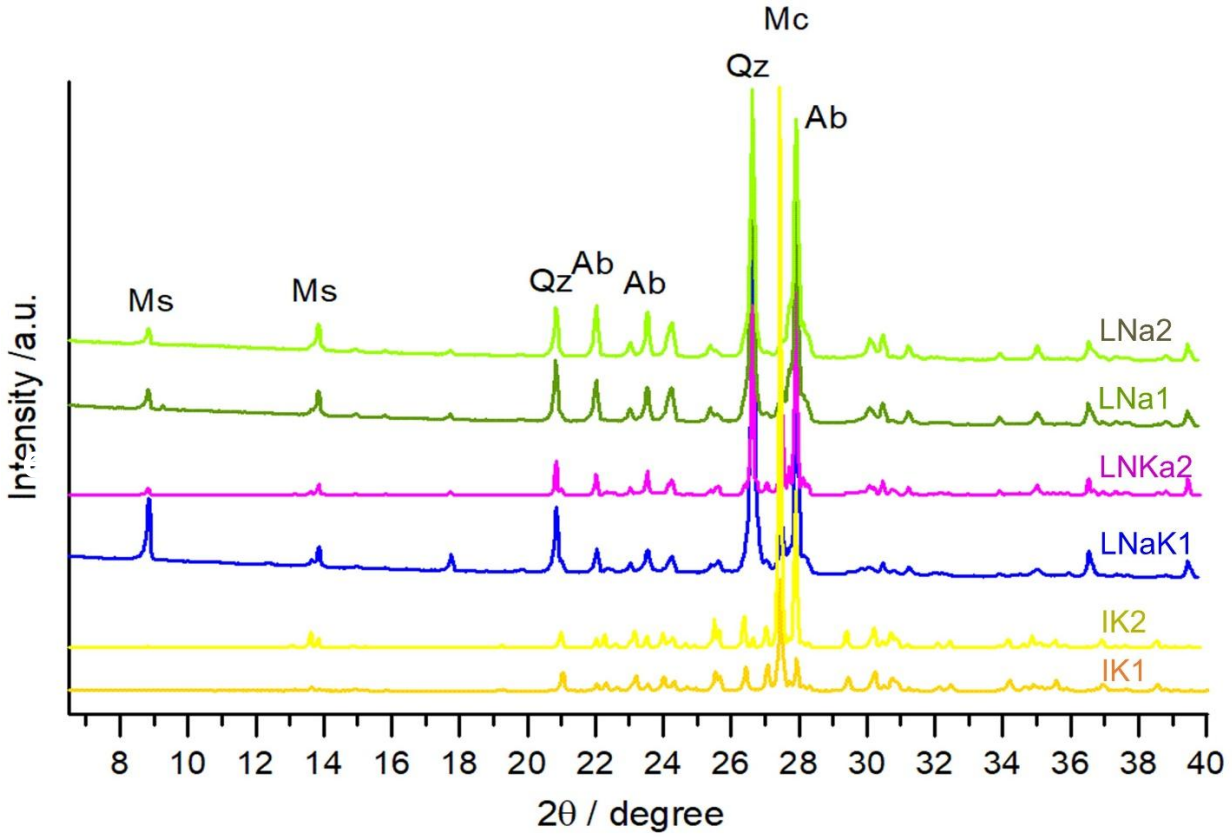

60

61 **Figure S3.** X-ray diffraction (XRD) spectra for all feldspar powders: IK1, IK2 (K-rich); LNaK1, LNaK2 (K/Na); and  
 62 LNa1, LNa2 (Na-rich). The analysis was performed over the  $2\theta$  range of 8-40°. Identified phases include: mica (Ms),  
 63 quartz (Qz), albite (Ab), and microcline (Mc).

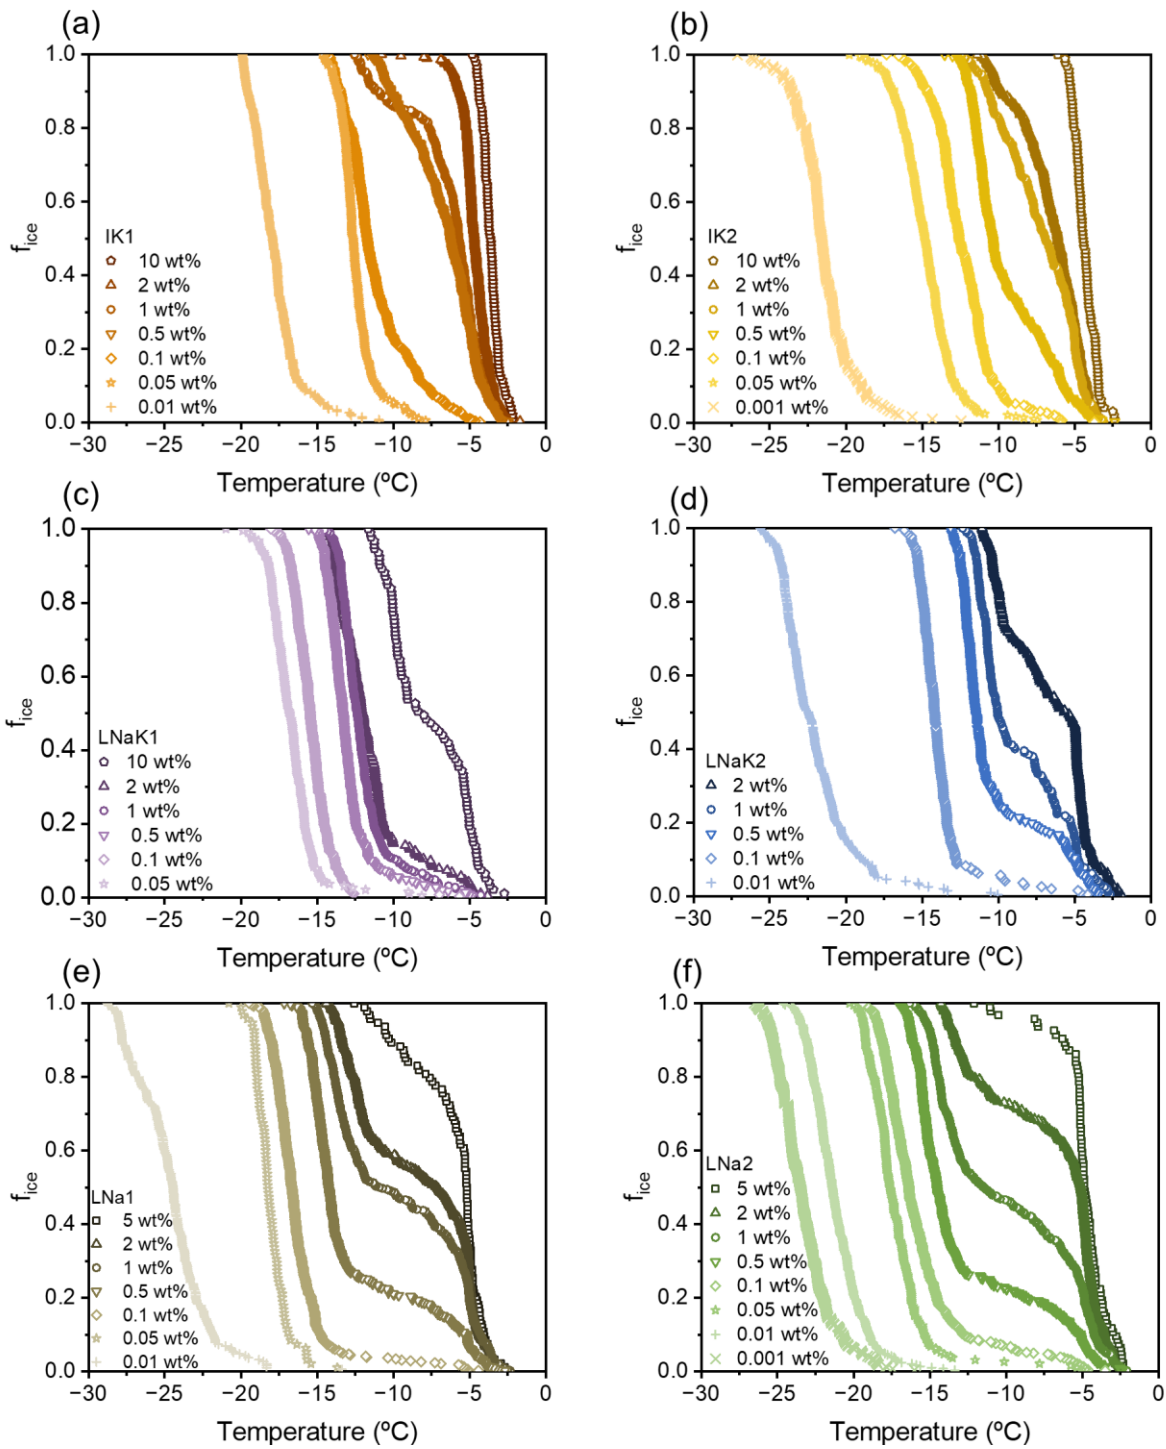

65

66 **Figure S4.** Fraction of frozen droplets,  $f_{ice}(T)$ , for all feldspar samples and concentrations tested. Panels correspond  
 67 to: (a) IK1, (b) IK2, (c) LNaK1, (d) LNaK2, (e) LNa1, and (f) LNa2.

68

69

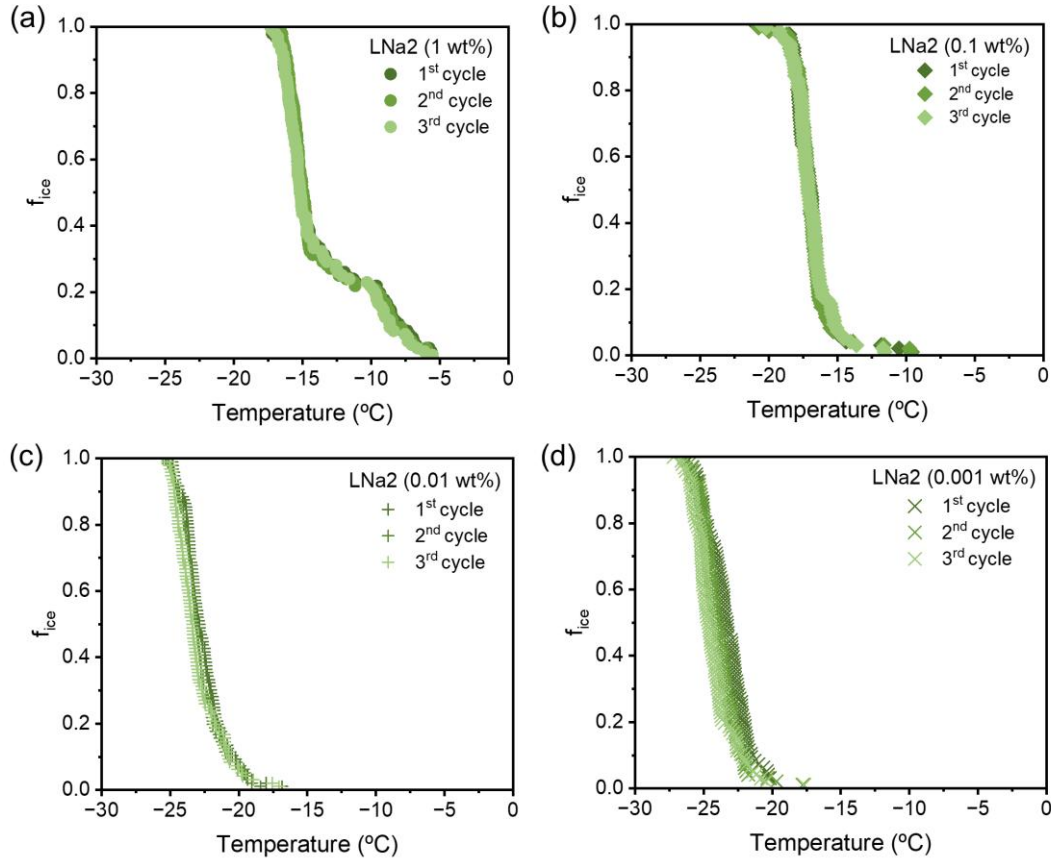

70

71 **Figure S5.** Freezing spectra of LNa2 feldspar suspensions at different concentrations. The fraction of frozen droplets,  
 72  $f_{ice}(T)$ , measured over three successive freeze-thaw cycles shows no significant variation, indicating stable IN  
 73 behavior. Panels show: (a) 1 wt%, (b) 0.1 wt%, (c) 0.01 wt%, and (d) 0.001 wt%.

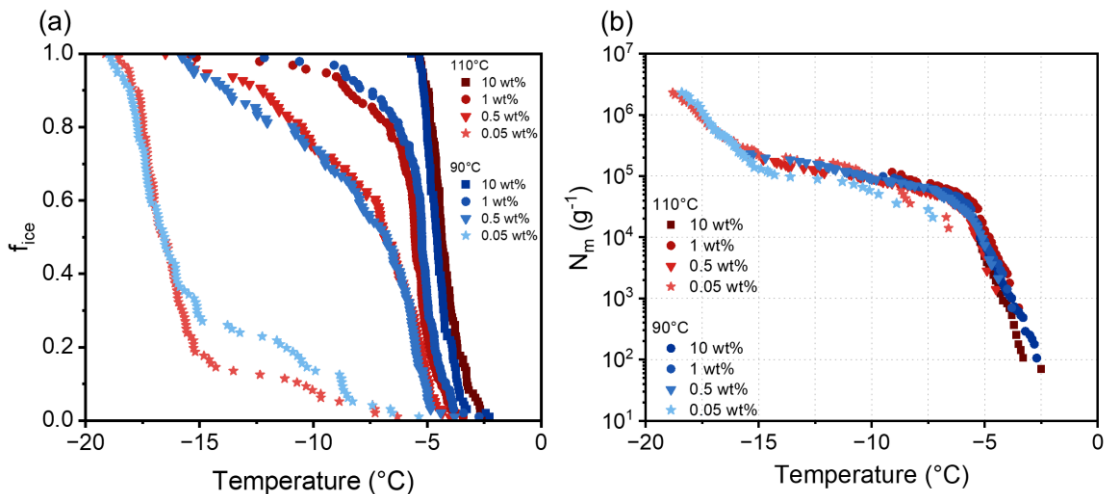

74

75 **Figure S6.** Immersion freezing assays of aqueous LNa suspensions (10, 1, 0.5, and 0.05 wt%) after heat treatment.  
 76 The fraction of frozen droplets,  $f_{ice}(T)$ , was measured after heating the suspensions at 90 °C and 110 °C for 30 min  
 77 to assess the potential contribution of biological IN contaminants. No changes in  $f_{ice}(T)$  were observed after heating,  
 78 indicating that biological contamination is unlikely under these temperature and time conditions. (a) Fraction of frozen  
 79 droplets,  $f_{ice}(T)$ . (b) Cumulative ice-nucleating site density per unit mass,  $N_m(T)$ .

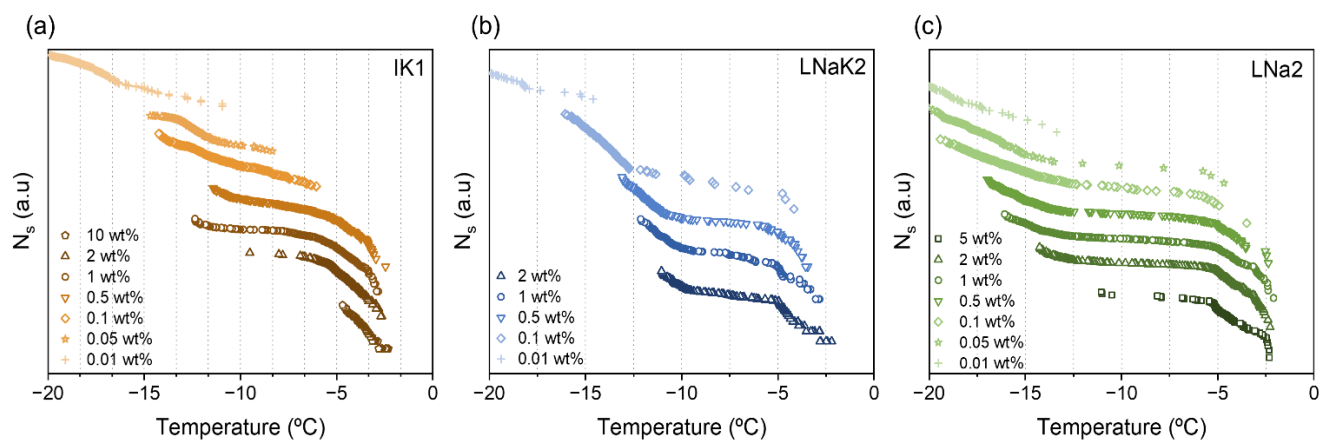

80

81 **Figure S7.** Ice-nucleating active site density,  $N_s(T)$ , as a function of temperature for different feldspar  
 82 suspensions. Curves are vertically offset to aid visualization and comparison of the freezing spectra. (a) IK1. (b)  
 83 LNaK2. (c) LNa2.

84

85 **HUB analysis**

86 **Table S3.** Averaging values for the first 10 freezing events,  $T_{(i,10)}$ , for each feldspar suspension: IK1, IK2, LNaK1,  
 87 LNaK2, LNa1, LNa2.

| IK1                  |        | IK2   |        | LNaK1 |        | LNaK2 |        | LNa1  |        | LNa2  |        |       |
|----------------------|--------|-------|--------|-------|--------|-------|--------|-------|--------|-------|--------|-------|
| wt%                  | T (°C) | wt%   | T (°C) | wt%   | T (°C) | wt%   | T (°C) | wt%   | T (°C) | wt%   | T (°C) |       |
| 10                   | -2.17  | 10    | -2.39  | 10    | -3.44  | 2     | -1.95  | 1     | -2.35  | 1     | -2.10  |       |
| 10                   | -2.18  | 10    | -2.41  | 10    | -3.67  | 2     | -2.20  | 1     | -2.50  | 2     | -2.28  |       |
| 10                   | -2.25  | 10    | -2.50  | 10    | -3.74  | 2     | -2.210 | 1     | -2.65  | 5     | -2.31  |       |
| 10                   | -2.31  | 10    | -3.06  | 2     | -3.83  | 2     | -2.21  | 0.5   | -2.68  | 5     | -2.32  |       |
| 10                   | -2.39  | 1     | -3.09  | 10    | -3.97  | 2     | -2.44  | 5     | -2.71  | 0.5   | -2.37  |       |
| 2                    | -2.41  | 2     | -3.15  | 10    | -3.98  | 2     | -2.50  | 2     | -2.79  | 1     | -2.38  |       |
| 10                   | -2.44  | 2     | -3.17  | 1     | -4.22  | 1     | -2.68  | 1     | -2.79  | 2     | -2.39  |       |
| 0.5                  | -2.46  | 1     | -3.18  | 10    | -4.25  | 2     | -2.77  | 2     | -2.82  | 5     | -2.39  |       |
| 1                    | -2.57  | 1     | -3.21  | 1     | -4.27  | 2     | -2.78  | 2     | -2.93  | 1     | -2.41  |       |
| 10                   | -2.62  | 10    | -3.26  | 2     | -4.28  | 2     | -2.79  | 5     | -2.97  | 5     | -2.41  |       |
| $T_{(i,10)}$         |        | -2.38 |        | -2.94 |        | -3.96 |        | -2.45 |        | -2.72 |        | -2.33 |
| $(^{\circ}\text{C})$ |        |       |        |       |        |       |        |       |        |       |        |       |

88

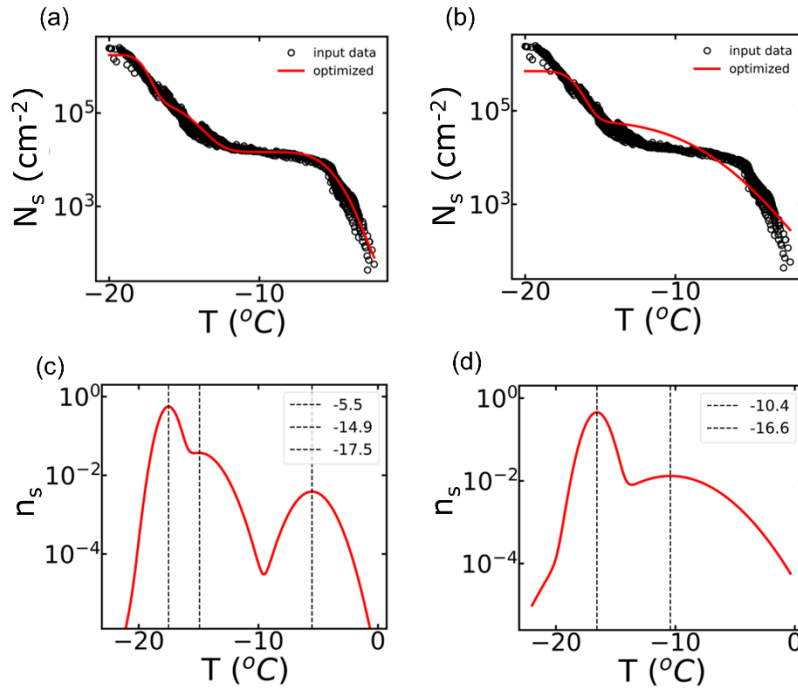

89

90 **Figure S8.** Subpopulation analysis of freezing experiments of the LNa1 feldspar suspension using HUB method (de  
 91 Almeida et al., 2023). Top panels: cumulative active-site density,  $N_s(T)$ , (black circles) with HUB-backwards fits (red  
 92 continuous lines) using (a) three, and (b) two subpopulations. Bottom panels: corresponding normalized differential  
 93 spectra,  $n_s(T)$ , where (c) corresponds to three-subpopulation model and (d) to the two-subpopulation model. Vertical  
 94 dashed lines indicate the mode temperatures ( $T_{mode}$ ) of each subpopulation. The three-subpopulation model reproduces  
 95 the freezing onset and overall spectral shape more accurately, yielding a lower mean squared error (MSE = 0.0041)  
 96 than the two-subpopulation model (MSE = 0.0652). Accordingly, the three-subpopulation fit was selected for  
 97 subsequent analyses. Fit parameters are reported in Table S4.

98

99 **Table S4.** Parameters of the normalized distribution functions obtained from the HUB subpopulation analysis of the  
 100 LNa1 feldspar freezing spectra shown in Fig. S8, using three and two subpopulations. Listed are the temperatures of  
 101 the corresponding subpopulation, and the probability of a droplet to freeze from each subpopulation. The mean squared  
 102 error (MSE) describes the quality of the found optimized solution for the cumulative spectra obtained with the HUB  
 103 analysis relative to the experimental cumulative spectra.

| Subpopulations |   | SubP-A |      | SubP-B |       | SubP-C |       | MSE    |
|----------------|---|--------|------|--------|-------|--------|-------|--------|
|                |   | T (°C) | %    | T (°C) | %     | T (°C) | %     |        |
| LNa1           | 3 | -5.51  | 1.16 | -14.9  | 12.58 | -17.51 | 86.26 | 0.0041 |
|                | 2 | -10.4  | 10.0 | -16.57 | 90.0  | -      | -     | 0.0652 |

104

105 **Table S5.** Temperatures corresponding to the subpopulations of the differential freezing spectra shown in Fig. 4 and  
 106 the probability of a droplet to freeze from each subpopulation. Note: Probability has been calculated assuming that all  
 107 droplets are frozen at -20 °C which is the case for densities below or approximately 0.01.

|       | SubP-A |     | SubP-B |      | SubP-C |       | MSE    |
|-------|--------|-----|--------|------|--------|-------|--------|
|       | T (°C) | %*  | T (°C) | %    | T (°C) | %     |        |
| IK1   | -5.4   | 0.3 | -13.1  | 10.9 | -17.4  | 88.7  | 0.0068 |
| IK2   | -6.1   | 0.8 | -13.5  | 18.0 | -16.4  | 81.2  | 0.0075 |
| LNaK1 | -5.7   | 0.2 | -14.1  | 10.4 | -16.5  | 89.4  | 0.0045 |
| LNaK2 | -5.6   | 0.4 | -14.0  | 24.9 | -16.0  | 74.61 | 0.0095 |
| LNa1  | -5.5   | 1.2 | -15    | 12.6 | -17.5  | 86.3  | 0.0041 |
| LNa2  | -5.5   | 0.8 | -15.4  | 16.7 | -18.0  | 82.4  | 0.0138 |

108

109

110 **Table S6.** Parameter of the normalized distribution functions of the freezing obtained through HUB method using  
 111 three Gaussian subpopulations of perthites published by Whale et al. (2017): Orthoclase perthites (Dark Shap,  
 112 Light Shap and LD4); Microcline perthites (KB14, Perthite, Keystone); and from Harrison et al. (2016): nearly  
 113 pure albite and microcline. Temperatures of the corresponding subpopulation, and the probability of a droplet to  
 114 freeze from each subpopulation. The mean squared error (MSE) describes the quality of the found optimized solution  
 115 for the cumulative spectra obtained with the HUB analysis relative to the experimental cumulative spectra.

|            | SubP-A |      | SubP-B |      | SubP-C |      | MSE    |
|------------|--------|------|--------|------|--------|------|--------|
|            | T (°C) | %*   | T (°C) | %    | T (°C) | %    |        |
| Dark Shap  | -4     | 8.5  | -11.9  | 20.2 | -14.9  | 71.3 | 0.0035 |
| Light Shap | -6.0   | 4.7  | -13.9  | 19.4 | -17.5  | 75.9 | 0.0063 |
| LD4        | -6.0   | 5.5  | -14.5  | 25.8 | -17.2  | 68.7 | 0.0085 |
| KB14       | -7.1   | 11.3 | -12    | 41.3 | -14.0  | 47.4 | 0.0033 |
| Perthite   | -6.1   | 5.5  | -10.0  | 27.1 | -13.0  | 67.5 | 0.0014 |
| Keystone   | -7.7   | 0.1  | -11.3  | 14.1 | -14.1  | 86.0 | 0.0029 |

116

117

118 **Table S7.** Parameters of the normalized distribution functions of the freezing obtained through HUB method (de  
 119 Almeida, 2023) using two or three Gaussians subpopulations of feldspar suspensions published by Kiselev et al.  
 120 (2021): FS08-VS 1 wt% (untreated Volkesfeld sanidine), FS08-64c (albite-shifted sanidine tempered at 550 °C for 64  
 121 days in vacuum), FS08-64o (albite-shifted sanidine tempered at 550 °C for 64days in NaCl-KCl salt mixture melt).  
 122 Temperatures of the corresponding subpopulation, and the probability of a droplet to freeze from each subpopulation.  
 123 The mean squared error (MSE) describes the quality of the found optimized solution for the cumulative spectra  
 124 obtained with the HUB analysis relative to the experimental cumulative spectra.

|          | SubP-A |      | SubP-B |      | SubP-C |      | MSE    |
|----------|--------|------|--------|------|--------|------|--------|
|          | T (°C) | %*   | T (°C) | %    | T (°C) | %    |        |
| FS08-64c | -14.4  | 11.4 | -18.0  | 88.6 | -      | -    | 0.002  |
| FS08-64o | -6.7   | 2.3  | -15.3  | 10.9 | -20.5  | 86.8 | 0.0034 |
| FS08-VS  | -19.7  | 26.8 | -23.6  | 73.2 | -      | -    | 0.0046 |

125

126

127 **References**

- 128 de Almeida Ribeiro, I., Meister, K., and Molinero, V.: HUB: a method to model and extract the distribution of ice  
129 nucleation temperatures from drop-freezing experiments, *Atmos. Chem. Phys.*, 23, 5623-5639,  
130 <https://doi.org/10.5194/acp-23-5623-2023>, 2023.
- 131 Harrison, A. D., Whale, T. F., Carpenter, M. A., Holden, M. A., Neve, L., O'Sullivan, D., Vergara Temprado, J., and  
132 Murray, B. J.: Not all feldspars are equal: A survey of ice nucleating properties across the feldspar group of minerals,  
133 *Atm. Chem. Phys.*, 16, 10927-10940, <https://doi.org/10.5194/acp-16-10927-2016>, 2016.
- 134 Kiselev, A. A., Keinert, A., Gaedeke, T., Leisner, T., Sutter, C., Petrishcheva, E., and Abart, R.: Effect of chemically  
135 induced fracturing on the ice nucleation activity of alkali feldspar, *Atmos. Chem. Phys.*, 21, 11801-11814,  
136 <https://doi.org/10.5194/acp-21-11801-2021>, 2021.
- 137 Whale, T. F., Holden, M. A., Kulak, A. N., Kim, Y. Y., Meldrum, F. C., Christenson, H. K., and Murray, B. J.: The role  
138 of phase separation and related topography in the exceptional ice-nucleating ability of alkali feldspars, *PCCP*, 19,  
139 31186-31193, <https://doi.org/10.1039/c7cp04898j>, 2017.
